# Supplementary material for: Reduced off-target effect of NG-BE4max by using NG-HiFi system
Source: PubMed Central journal article supplement — Mol Ther Nucleic Acids. 2021 May 19;25:168–72. doi: 10.1016/j.omtn.2021.05.012 (PMC8368781; doi:10.1016/j.omtn.2021.05.012), 2021-05-19
Supplement: mmc1.pdf [file mmc1.pdf]

OMTN, Volume 25

## **Supplemental information**

**Reduced off-target effect of NG-BE4max**

**by using NG-HiFi system**

**Huanhuan Shan, Zhiquan Liu, Yingqi Jia, Siyu Chen, Mao Chen, Yuning Song, Tingting Sui, Liangxue Lai, and Zhanjun Li**

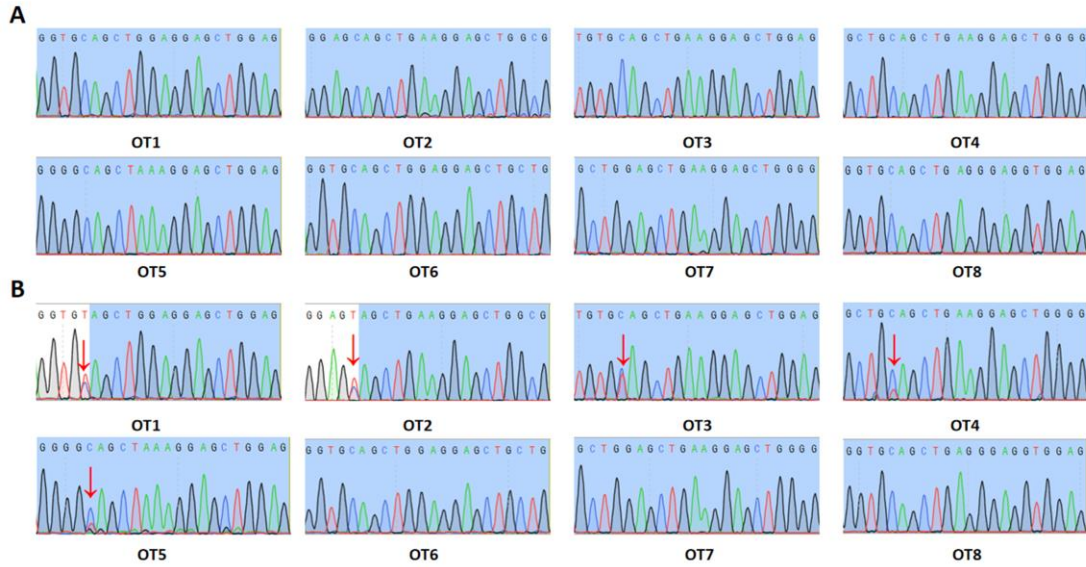

**Figure S1.** The significantly increased off-target effect in *Hoxc13* (Q87Stop) rabbits generated by SpCas9-NG. Representative sequencing chromatograms of off-target detection in WT (A) and *Hoxc13* (Q87Stop) (B) rabbits. The 20 bp of the POTS and the PAM are represented in shadow. Red arrows, the off-target effect.

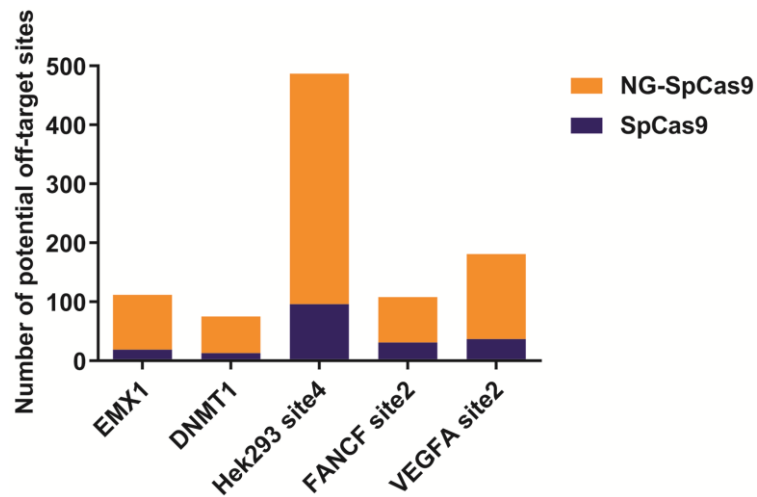

**Figure S2.** The significantly increased potential off-target sites (POTs) by SpCas9-NG compared with wild-type SpCas9. The potential off-target sites (POTs) were predicted by using Cas-OFFinder.

**A**

Wildtype p. 225 -S--N--V--R--H--A--L--G--S--S--E--Y--P--L--R--R--R--Q--C--E-  
c. 675 ·TCCAACGTCCGCCACGCCCTGGGCTCTAGCGAGTACCCTCTGCGGGCGGCCAGTGTGAA  
p. 245 -E--V--A--R--A--L--G--K--E--S--L--R--E--V--Q--L--E--E--L--E-  
c. 735 ·GAGGTGGCCCGGGCGCTCGGCAAGGAGACCTTCGGGAGGTGCAGCTGGAGGAGCTGGAG

Mutant p. 225 -S--N--V--R--H--A--L--G--S--S--E--Y--P--L--R--R--R--Q--C--E-  
c. 675 ·TCCAACGTCCGCCACGCCCTGGGCTCTAGCGAGTACCCTCTGCGGGCGGCCAGTGTGAA  
p. 245 -E--V--A--R--A--L--G--K--E--S--L--R--E--V--\*  
c. 735 ·GAGGTGGCCCGGGCGCTCGGCAAGGAGACCTTCGGGAGGTGTAG

**B**

Wildtype p. 693 -L--E--Q--I--F--R--E--A--E--S--M--V--A--R--K--Q--F--G--H--P-  
c. 2079 ·CTGGAGCAGATCTTCCGCGAGGCGGAGAGCATGGTTGCGCGCAAGCAGTTCGGGCACCCG  
p. 713 -Q--I--E--A--R--I--K--E--V--S--A--Q--W--E--Q--L--K--E--L--A-  
c. 2139 ·CAGATCGAGGCCCGCATCAAGGAGGTGTCCGCCAGTGGGAGCAGCTGAAGGAGCTGGCG

Mutant p. 693 -L--E--Q--I--F--R--E--A--E--S--M--V--A--R--K--Q--F--G--H--P-  
c. 2079 ·CTGGAGCAGATCTTCCGCGAGGCGGAGAGCATGGTTGCGCGCAAGCAGTTCGGGCACCCG  
p. 713 -Q--I--E--A--R--I--K--E--V--S--A--Q--W--E--\*  
c. 2139 ·CAGATCGAGGCCCGCATCAAGGAGGTGTCCGCCAGTGGGAGTAG

**Figure S3.** The premature termination codon (PTC) mutation was determined in the OT1 (GALK1, p.Q258stop) and OT2 (SPTB, p.Q727stop) sites. Asterisk, PTC mutation. (A) OT1 (GALK1, p.Q258stop), (B) OT2 (SPTB, p.Q727stop).

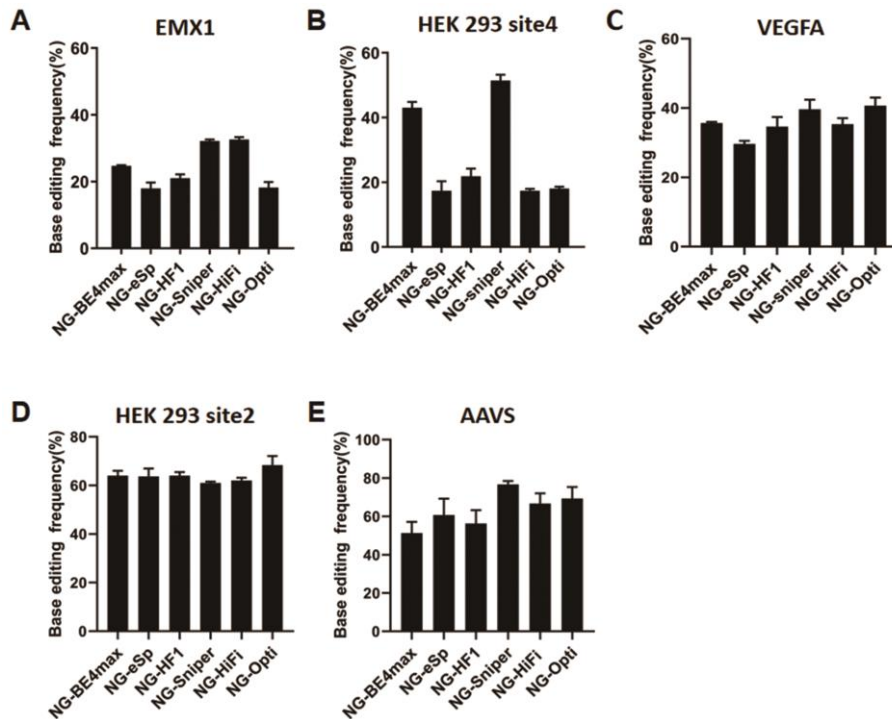

**Figure S4.** On-target base editing efficiency of five endogenous genomic loci using NG-BE4max and high-fidelity base editors in HEK 293T cells.

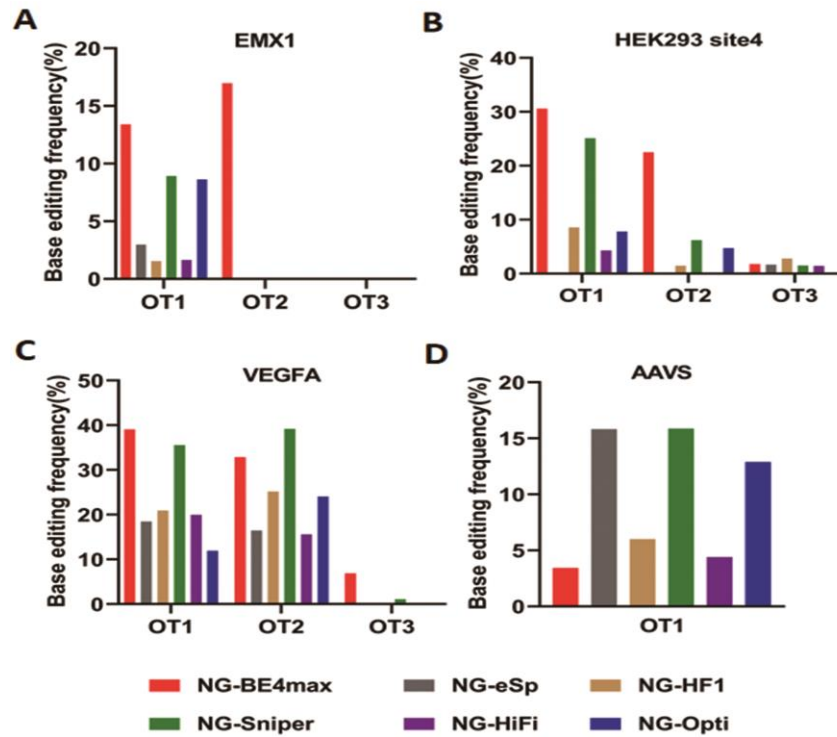

**Figure S5.** The off-target effect of NG-BE4max and five high-fidelity base editors were determined by deep sequencing.

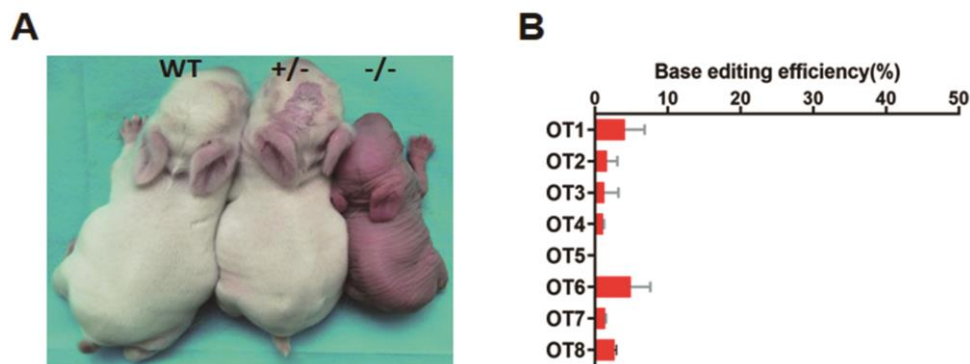

**Figure S6.** (A) Photographs of the F1 *Hoxc13* (Q87Stop) rabbits generated by the NG-HiFi system. (B) The significantly reduced off-target effect for F1 generation *Hoxc13* rabbits generated by the NG-HiFi system.

**Table S1.** Generation of *Hoxc13* (Q87Stop) rabbits by NG-BE4max and NG-HiFi base editors.

**Table S2.** The predicted phenotype of off-target mutation.

**Table S3.** The primers used for identifying potential off-target sites of *Hoxc13* (Q87Stop) rabbits.

The mismatched nucleotides are shown in lower case.

**Table S4.** Primers used for genotyping of mutation sites in this study.

**Table S5.** The primers used for identifying potential off-target sites of NG-BE4max and five high-fidelity base editors in 293T cells. The mismatched nucleotides are shown in lower case.

**Table S6.** Primers of the site mutation of high-fidelity CRISPR/Cas9 systems.
